# Supplementary material
Source: PubMed Central journal article supplement (PMC1876475)
Supplement: pcbi.0030079.st002.pdf [file pcbi.0030079.st002.pdf]

| Jitter SD | SAP                  | Stoch. $\mu$ -saltation |  |
|-----------|----------------------|-------------------------|--|
| $\infty$  | <i>noise</i>         | <i>noise</i>            |  |
| -10%      | y                    | y                       |  |
| -5%       | y                    | y                       |  |
| $\infty$  | <i>not excitable</i> | <i>not excitable</i>    |  |
| +21%      | y                    | y                       |  |
| $\infty$  | <i>noise</i>         | <i>noise</i>            |  |
| +51%      | y                    | y                       |  |
| +12%      | y                    | y                       |  |
| +14%      | y                    | y                       |  |
| $\infty$  | <i>noise</i>         | <i>noise</i>            |  |
| $\infty$  | <i>not excitable</i> | <i>not excitable</i>    |  |
| +498%     | y                    | y                       |  |
| +1016%    | y                    | y                       |  |
| -5%       | y                    | y                       |  |

Table S2: Parameter variations for a 0.3  $\mu\text{m}$  diameter cortical pyramidal cell axon collateral of 10mm length Effects of varying Na and K channel densities ( $\rho_{Na}, \rho_K$ ), axoplasmic resistance ( $R_a$ ), membrane leak ( $g_{Leak}$ ), and resting potential ( $V_0$ )  $\pm 50\%$  from standard parameter values in Tab. SS2. The table lists the change in spike time travel time jitter (measured in SD) and the occurrence of stochastic APs and stochastic micro-saltatory conduction effects, which occurred for all parameters. The term *noise* refers to the break down of communication on the axon, being so noisy, such that no specific AP could be discerned. The term *not excitable* refers to the AP to be either not triggerable or not repolarizing.
