# Supplementary material
Source: PubMed Central journal article supplement (PMC1876475)

Travelling AP at equivalent (half-peak) axon positions

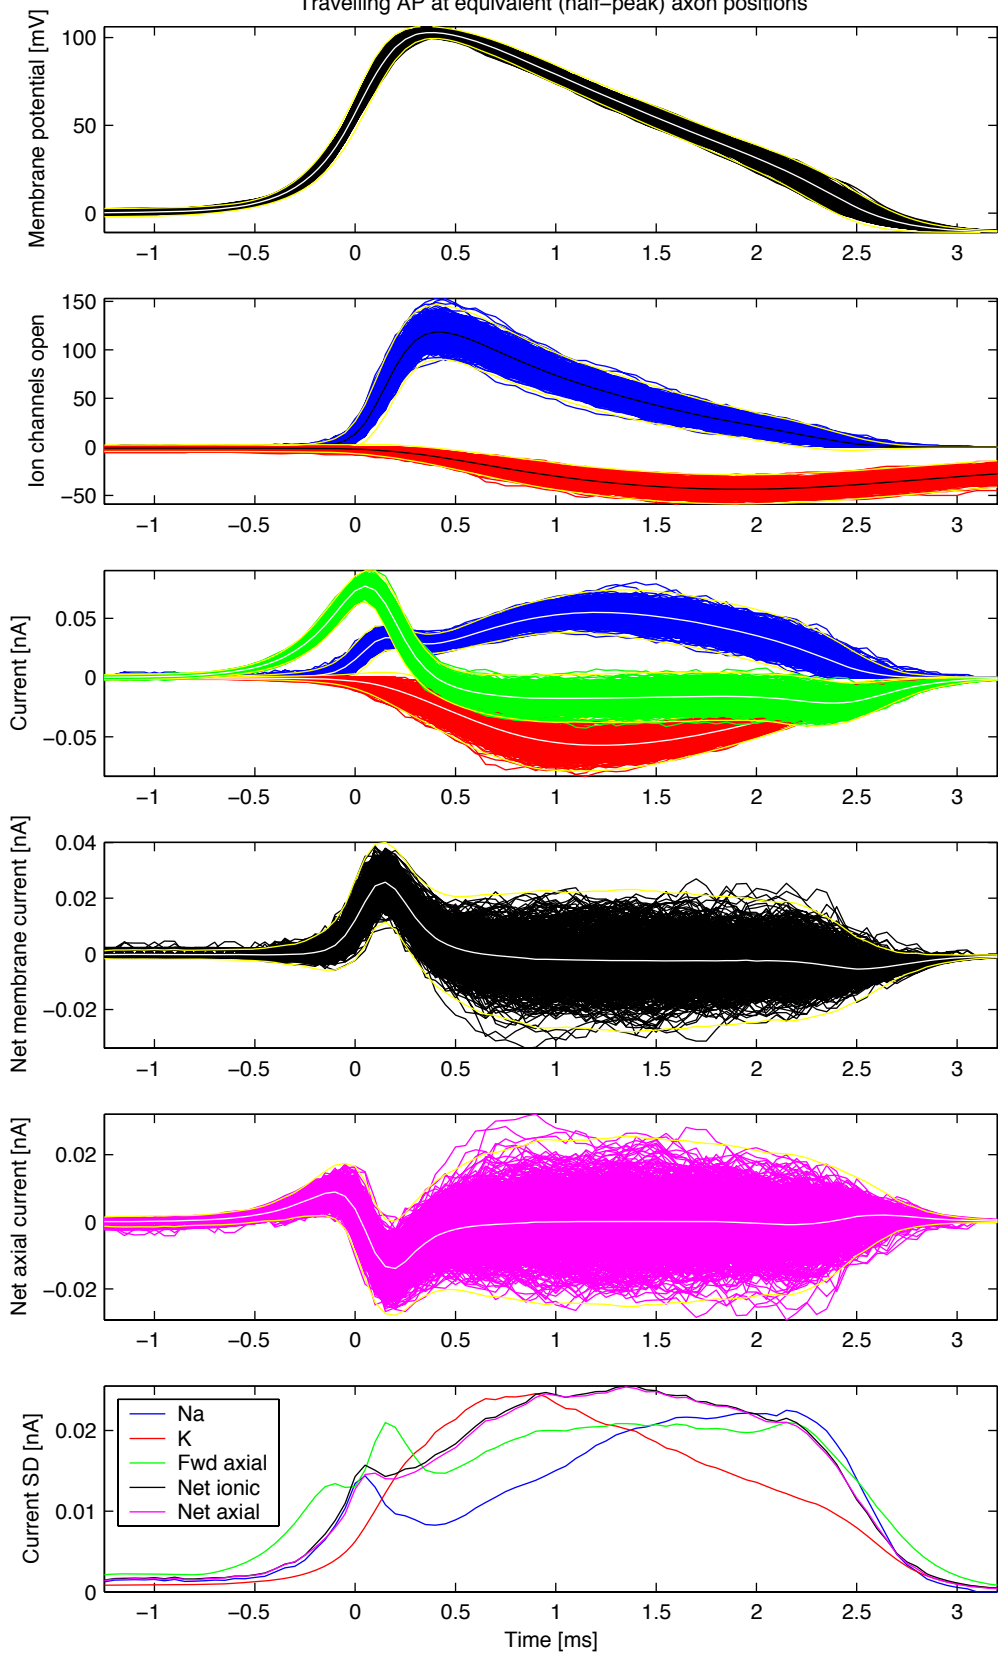

Supplement: pcbi.0030079.sg003.pdf [file pcbi.0030079.sg003.pdf]

### Travelling AP at equivalent (half-peak) axon positions

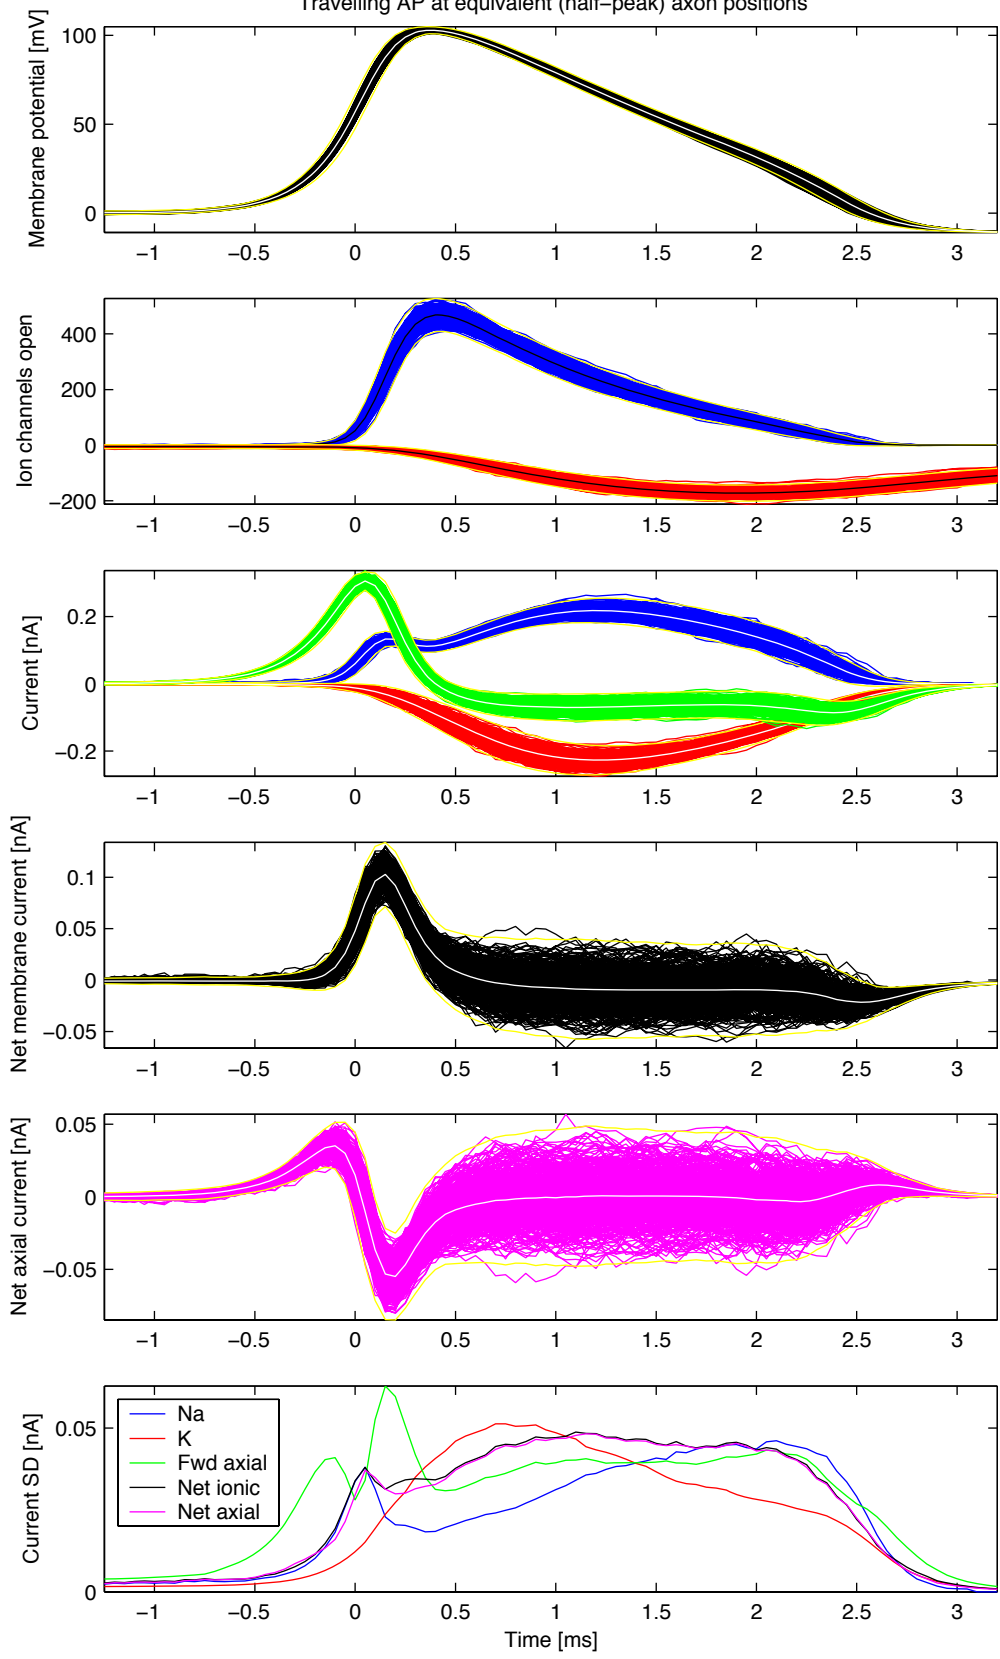

Supplement: pcbi.0030079.sg004.pdf [file pcbi.0030079.sg004.pdf]

Travelling AP at equivalent (half-peak) axon positions

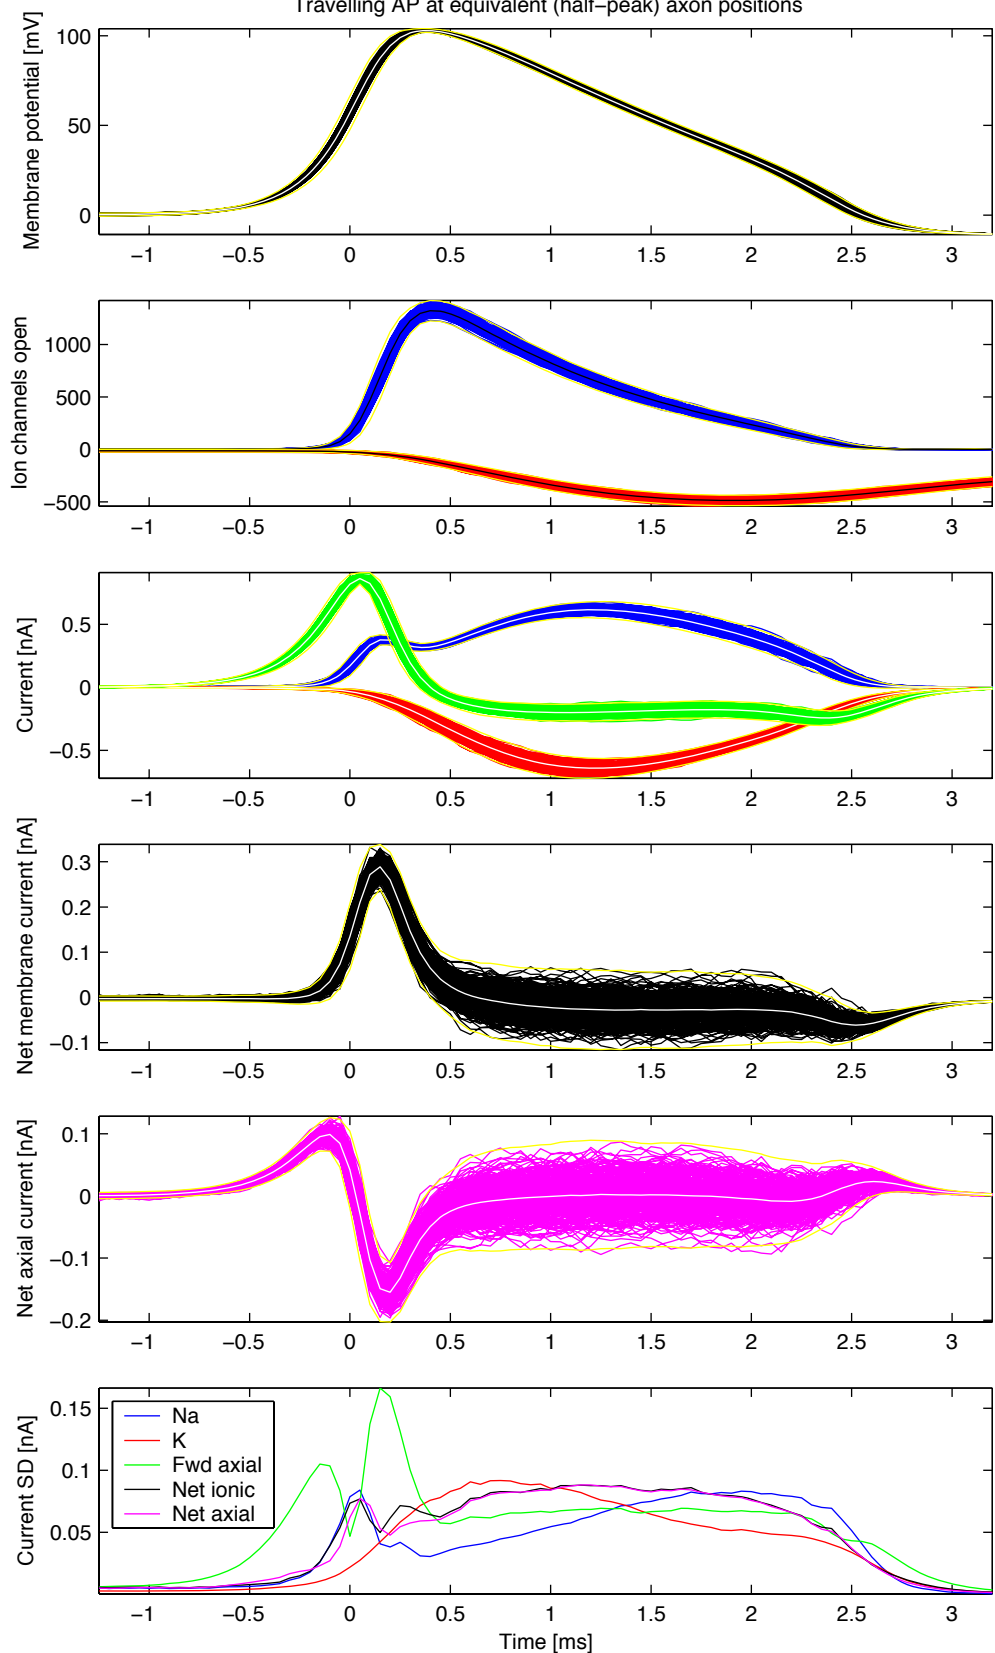

Supplement: pcbi.0030079.sg005.pdf [file pcbi.0030079.sg005.pdf]
